# Supplementary material
Source: HighWire-hosted journal article supplement (doi:10.1101/rna.080122.124)
Supplement: Supplemental_Table_S1.xlsx [file Supplemental_Table_S1.xlsx]

## Sheet: Supplemental_Table_ S1
Supplemental Table S1: RNA predator affinity predictions
Rank	Energy	z-Score	mRNA	mRNA	sRNA	Gene	Locus	Strand	Genomic	Accession	Replicon
	[kJ/mol]		[Start]	[End]		Annotation	Tag		Coordinates
1	-36.57	-13.36	-174	-145	01-30	hypothetical protein NWMN 1720 NWMN	NWMN_1720	+	1918378-1919117	NC_009641	chromosome
2	-19.15	-5.38	43	72	49-76	hypothetical protein NWMN 0430 NWMN	NWMN_0430	-	482932-482463	NC_009641	chromosome
3	-16.55	-4.19	2082	2099	3-20	type I restriction modification system restriction endonuclease subunit NWMN	NWMN_0139	+	174054-177043	NC_009641	chromosome
4	-16.11	-3.99	1484	1499	67-82	DNA topoisomerase IV subunit A NWMN	NWMN_1268	+	1393952-1396554	NC_009641	chromosome
5	-16.06	-3.97	186	204	66-84	hypothetical protein NWMN 0285 NWMN	NWMN_0285	+	336345-336781	NC_009641	chromosome
6	-16.02	-3.95	560	581	3-25	hypothetical protein NWMN 0629 NWMN	NWMN_0629	+	709843-711083	NC_009641	chromosome
7	-15.95	-3.92	294	304	66-76	acyl CoA dehydrogenase FadD like protein NWMN	NWMN_0169	-	219339-217883	NC_009641	chromosome
8	-15.94	-3.91	1577	1593	71-87	alpha D 1;4 glucosidase NWMN	NWMN_1414	-	1584859-1583010	NC_009641	chromosome
9	-15.09	-3.53	227	243	7-24	myosin cross reactive antigen NWMN	NWMN_0050	-	68226-66251	NC_009641	chromosome
10	-14.74	-3.37	167	193	70-96	exodeoxyribonuclease VII large subunit NWMN	NWMN_1428	-	1601484-1599947	NC_009641	chromosome
11	-14.73	-3.36	4830	4843	9-22	hypothetical protein NWMN 0123 NWMN	NWMN_0123	+	148828-156197	NC_009641	chromosome
12	-14.28	-3.15	315	333	9-25	fatty acid biosynthesis transcriptional regulator NWMN	NWMN_1138	+	1247850-1248622	NC_009641	chromosome
13	-14.27	-3.15	866	894	66-92	cation efflux family protein NWMN	NWMN_2050	+	2266787-2267967	NC_009641	chromosome
14	-14.24	-3.14	491	513	3-24	teicoplanin resistance associated protein B NWMN	NWMN_2256	-	2479588-2478180	NC_009641	chromosome
15	-14.2	-3.12	208	236	52-81	hypothetical protein NWMN 0445 NWMN	NWMN_0445	+	508475-510012	NC_009641	chromosome
16	-13.76	-2.92	206	226	66-84	geranylgeranylglyceryl phosphate synthase like protein NWMN	NWMN_1844	-	2056104-2055212	NC_009641	chromosome
17	-13.73	-2.9	3733	3751	71-91	hypothetical protein NWMN 0223 NWMN	NWMN_0223	+	281156-285795	NC_009641	chromosome
18	-13.7	-2.89	692	705	66-79	UDP N acetylglucosamine pyrophosphorylase NWMN	NWMN_0462	+	523314-524872	NC_009641	chromosome
19	-13.7	-2.89	-116	-98	3-21	hypothetical protein NWMN 0117 NWMN	NWMN_0117	+	142189-143363	NC_009641	chromosome
20	-13.6	-2.84	1159	1180	34-53	acetyl CoA acetyltransferase like protein NWMN	NWMN_0167	-	215606-214222	NC_009641	chromosome
21	-13.56	-2.83	-43	-25	66-84	hypothetical protein NWMN 0286 NWMN	NWMN_0286	+	336574-337160	NC_009641	chromosome
22	-13.49	-2.79	349	356	66-73	hypothetical protein NWMN 2252 NWMN	NWMN_2252	+	2473603-2474441	NC_009641	chromosome
23	-13.45	-2.78	172	193	3-22	dimethyladenosine transferase NWMN	NWMN_0456	+	518953-520046	NC_009641	chromosome
24	-13.35	-2.73	286	306	2-20	cytochrome oxidase assembly protein NWMN	NWMN_0980	-	1090381-1089111	NC_009641	chromosome
25	-13.35	-2.73	-164	-137	3-25	amino acid ABC transporter; permease protein NWMN	NWMN_2346	-	2581041-2580206	NC_009641	chromosome
26	-13.09	-2.61	175	193	66-84	glutamyl aminopeptidase NWMN	NWMN_2354	-	2591710-2590434	NC_009641	chromosome
27	-13.07	-2.6	1265	1279	2-16	acyl CoA synthetase FadE like protein NWMN	NWMN_0170	-	220911-219206	NC_009641	chromosome
28	-13.05	-2.59	114	131	66-85	ferrichrome transport permease fhuB NWMN	NWMN_0617	+	699149-700326	NC_009641	chromosome
29	-13.02	-2.58	1929	1949	7-28	DNA mismatch repair protein NWMN	NWMN_1205	+	1329068-1331277	NC_009641	chromosome
30	-13	-2.57	339	359	71-96	hypothetical protein NWMN 2367 NWMN	NWMN_2367	-	2605573-2604552	NC_009641	chromosome
31	-12.94	-2.54	-38	-21	1-20	50S ribosomal protein L21 NWMN	NWMN_1549	-	1716500-1715992	NC_009641	chromosome
32	-12.81	-2.48	193	222	1-25	hypothetical protein NWMN 1584 NWMN	NWMN_1584	-	1755239-1753552	NC_009641	chromosome
33	-12.79	-2.47	385	405	71-95	tagatose 1;6 diphosphate aldolase NWMN	NWMN_2096	-	2335547-2334367	NC_009641	chromosome
34	-12.73	-2.45	1532	1545	66-79	hypothetical protein NWMN 0419 NWMN	NWMN_0419	+	468475-471380	NC_009641	chromosome
35	-12.69	-2.43	345	365	67-84	peptidyl tRNA hydrolase NWMN	NWMN_0465	+	526898-527670	NC_009641	chromosome
36	-12.67	-2.42	181	201	66-86	hypothetical protein NWMN 2122 NWMN	NWMN_2122	-	2359959-2358953	NC_009641	chromosome
37	-12.67	-2.42	56	76	4-26	hypothetical protein NWMN 0297 NWMN	NWMN_0297	+	344571-345220	NC_009641	chromosome
38	-12.52	-2.35	397	411	69-83	hypothetical protein NWMN 0041 NWMN	NWMN_0041	+	54054-55240	NC_009641	chromosome
39	-12.49	-2.34	418	428	9-19	hypothetical protein NWMN 0601 NWMN	NWMN_0601	-	683000-681871	NC_009641	chromosome
40	-12.48	-2.33	-157	-144	71-84	ABC transporter ATP binding protein NWMN	NWMN_2261	-	2484833-2483968	NC_009641	chromosome
41	-12.48	-2.33	456	474	12-31	hypothetical protein NWMN 2386 NWMN	NWMN_2386	-	2622820-2619759	NC_009641	chromosome
42	-12.43	-2.31	887	903	10-26	aspartate semialdehyde dehydrogenase NWMN	NWMN_1305	+	1437852-1439041	NC_009641	chromosome
43	-12.38	-2.29	736	759	66-86	carbamoyl phosphate synthase large subunit NWMN	NWMN_1114	+	1218707-1222080	NC_009641	chromosome
44	-12.3	-2.25	105	118	71-84	oligopeptide ABC transporter; permease protein NWMN	NWMN_0865	+	961209-962290	NC_009641	chromosome
45	-12.25	-2.23	2127	2139	45-57	Ser Asp rich fibrinogen/bone sialoprotein binding protein SdrC NWMN	NWMN_0523	+	601468-604511	NC_009641	chromosome
46	-12.21	-2.21	132	151	66-86	hypothetical protein NWMN 2269 NWMN	NWMN_2269	+	2492562-2494435	NC_009641	chromosome
47	-12.2	-2.2	-86	-67	8-28	glycerol uptake operon antiterminator regulatory protein NWMN	NWMN_1206	+	1331083-1331825	NC_009641	chromosome
48	-12.19	-2.2	945	969	3-26	acetate kinase NWMN	NWMN_1605	-	1783740-1782338	NC_009641	chromosome
49	-12.18	-2.19	-173	-154	9-26	hypothetical protein NWMN 0996 NWMN	NWMN_0996	+	1104278-1104795	NC_009641	chromosome
50	-12.14	-2.18	-175	-156	9-26	hypothetical protein NWMN 0270 NWMN	NWMN_0270	+	326641-327101	NC_009641	chromosome
51	-12.14	-2.18	415	433	66-84	lysine specific permease NWMN	NWMN_1575	-	1742329-1740636	NC_009641	chromosome
52	-12.13	-2.17	367	380	12-25	succinyl CoA synthetase subunit alpha NWMN	NWMN_1156	+	1267831-1268939	NC_009641	chromosome
53	-12.11	-2.16	-174	-155	9-26	hypothetical protein NWMN 1810 NWMN	NWMN_1810	-	2017271-2016811	NC_009641	chromosome
54	-12.1	-2.16	531	542	15-26	glyceraldehyde 3 phosphate dehydrogenase 2 NWMN	NWMN_1580	-	1749131-1747906	NC_009641	chromosome
55	-12.09	-2.15	2263	2276	71-84	bifunctional acetaldehyde CoA/alcohol dehydrogenase NWMN	NWMN_0094	+	116315-119124	NC_009641	chromosome
56	-12.08	-2.15	466	487	34-56	hypothetical protein NWMN 0943 NWMN	NWMN_0943	-	1048615-1047594	NC_009641	chromosome
57	-12.07	-2.14	653	666	9-21	KDP operon transcriptional regulatory protein NWMN	NWMN_1984	+	2204562-2205457	NC_009641	chromosome
58	-12.07	-2.14	501	529	25-54	peptidase M20/M25/M40 family protein NWMN	NWMN_2230	-	2452805-2451484	NC_009641	chromosome
59	-12.05	-2.13	252	261	2-12	mannitol specific IIA component NWMN	NWMN_2059	+	2280713-2281347	NC_009641	chromosome
60	-11.99	-2.11	893	908	42-57	aminotransferase; class V NWMN	NWMN_1616	+	1793378-1794738	NC_009641	chromosome
61	-11.96	-2.09	2517	2535	67-86	hypothetical protein NWMN 2542 NWMN	NWMN_2542	-	2801857-2798670	NC_009641	chromosome
62	-11.94	-2.08	880	895	7-21	phage N acetylglucosamidase NWMN	NWMN_0309	+	357682-359780	NC_009641	chromosome
63	-11.93	-2.08	-93	-81	66-77	peptidyl prolyl cis/trans isomerase NWMN	NWMN_1733	+	1931898-1933060	NC_009641	chromosome
64	-11.89	-2.06	3345	3357	45-57	Ser Asp rich fibrinogen/bone sialoprotein binding protein sdrD NWMN	NWMN_0524	+	604678-608825	NC_009641	chromosome
65	-11.88	-2.06	159	176	67-87	hypothetical protein NWMN 1688 NWMN	NWMN_1688	+	1883305-1883957	NC_009641	chromosome
66	-11.85	-2.04	-69	-54	42-57	aldehyde dehydrogenase NWMN	NWMN_1858	+	2071030-2072609	NC_009641	chromosome
67	-11.83	-2.03	131	150	66-85	hypothetical protein NWMN 0012 NWMN	NWMN_0012	+	17124-18310	NC_009641	chromosome
68	-11.83	-2.03	1432	1444	62-74	hypothetical protein NWMN 2082 NWMN	NWMN_2082	+	2319536-2321712	NC_009641	chromosome
69	-11.82	-2.03	1040	1050	9-19	hypothetical protein NWMN 0228 NWMN	NWMN_0228	+	287339-289392	NC_009641	chromosome
70	-11.75	-2	1022	1038	71-87	argininosuccinate synthase NWMN	NWMN_0832	-	921493-920088	NC_009641	chromosome
71	-11.73	-1.99	-67	-48	66-85	hypothetical protein NWMN 1527 NWMN	NWMN_1527	-	1693031-1692649	NC_009641	chromosome
72	-11.72	-1.98	768	780	71-83	hypothetical protein NWMN 0325 NWMN	NWMN_0325	-	376510-374355	NC_009641	chromosome
73	-11.71	-1.98	562	577	66-82	oxidoreductase; short chain dehydrogenase/reductase family protein NWMN	NWMN_2229	-	2451573-2450492	NC_009641	chromosome
74	-11.71	-1.98	133	143	67-77	iron compound ABC transporter; iron compound binding protein NWMN	NWMN_0581	+	662395-663482	NC_009641	chromosome
75	-11.69	-1.97	-68	-54	71-85	diacylglycerol glucosyltransferase NWMN	NWMN_0887	-	985034-983659	NC_009641	chromosome
76	-11.69	-1.97	449	463	66-83	argininosuccinate lyase NWMN	NWMN_0831	-	920298-918719	NC_009641	chromosome
77	-11.67	-1.96	582	593	1-12	oligopeptide transporter permease NWMN	NWMN_1292	-	1424150-1423120	NC_009641	chromosome
78	-11.65	-1.95	-39	-23	9-27	dephospho CoA kinase NWMN	NWMN_1581	-	1749924-1749101	NC_009641	chromosome
79	-11.65	-1.95	1257	1270	11-23	staphylococcal respiratory response protein SrrB NWMN	NWMN_1399	-	1570483-1568532	NC_009641	chromosome
80	-11.65	-1.95	137	145	66-74	hypothetical protein NWMN 1657 NWMN	NWMN_1657	-	1854293-1853266	NC_009641	chromosome
81	-11.64	-1.95	60	71	68-79	hypothetical protein NWMN 2591 NWMN	NWMN_2591	+	2857936-2858600	NC_009641	chromosome
82	-11.63	-1.94	-150	-130	66-87	hypothetical protein NWMN 2452 NWMN	NWMN_2452	+	2698540-2699225	NC_009641	chromosome
83	-11.62	-1.94	230	242	71-84	hypothetical protein NWMN 2506 NWMN	NWMN_2506	-	2754223-2752404	NC_009641	chromosome
84	-11.61	-1.93	893	913	68-87	ATP dependent DNA helicase NWMN	NWMN_0689	+	771485-773466	NC_009641	chromosome
85	-11.59	-1.92	440	456	66-83	6 phosphofructokinase NWMN	NWMN_1593	-	1767713-1766545	NC_009641	chromosome
86	-11.59	-1.92	167	185	66-86	DNA polymerase IV NWMN	NWMN_1833	-	2040704-2039434	NC_009641	chromosome
87	-11.58	-1.92	306	332	88-113	hypothetical protein NWMN 2215 NWMN	NWMN_2215	-	2437601-2436664	NC_009641	chromosome
88	-11.57	-1.91	881	896	7-21	phage N acetylglucosamidase NWMN	NWMN_1773	-	1986382-1984284	NC_009641	chromosome
89	-11.57	-1.91	880	895	7-21	phage N acetylglucosamidase NWMN	NWMN_1035	+	1135744-1137842	NC_009641	chromosome
90	-11.51	-1.89	460	474	40-54	chromosome partioning ParB family protein NWMN	NWMN_0353	+	404422-405467	NC_009641	chromosome
91	-11.49	-1.88	190	206	3-19	o succinylbenzoic acid coa ligase NWMN	NWMN_1686	-	1882788-1881110	NC_009641	chromosome
92	-11.47	-1.87	-141	-121	66-84	zinc specific metalloregulatory protein NWMN	NWMN_1457	-	1625423-1624813	NC_009641	chromosome
93	-11.47	-1.87	91	105	68-86	hypothetical protein NWMN 0576 NWMN	NWMN_0576	+	656613-657334	NC_009641	chromosome
94	-11.45	-1.86	62	72	66-76	phosphoribosylaminoimidazole synthetase NWMN	NWMN_0939	+	1042770-1043998	NC_009641	chromosome
95	-11.45	-1.86	218	237	67-83	hypothetical protein NWMN 2407 NWMN	NWMN_2407	-	2650696-2648604	NC_009641	chromosome
96	-11.45	-1.86	450	461	10-21	hypothetical protein NWMN 2594 NWMN	NWMN_2594	+	2861602-2862377	NC_009641	chromosome
97	-11.41	-1.84	352	363	9-20	guanosine 5' monophosphate oxidoreductase NWMN	NWMN_1249	+	1372419-1373596	NC_009641	chromosome
98	-11.39	-1.83	330	341	67-78	hypothetical protein NWMN 0535 NWMN	NWMN_0535	+	620335-621191	NC_009641	chromosome
99	-11.36	-1.82	73	86	40-53	leukocidin/hemolysin toxin subunit F NWMN	NWMN_1927	-	2134556-2133340	NC_009641	chromosome
100	-11.36	-1.82	927	942	11-27	hypothetical protein NWMN 1648 NWMN	NWMN_1648	+	1836853-1838321	NC_009641	chromosome
