# Supplementary material
Source: HighWire-hosted journal article supplement (doi:10.1101/rna.080122.124)
Supplement: Supplemental_Table_S3.xlsx [file Supplemental_Table_S3.xlsx]

## Sheet: Supplementary_Table_S3
Supplementary Table S3: Strains used in this study
Strains	Genotypes and descriptions	References
E. coli strain
DH5α	a F- f80 DlacZ DM15 D(lacZA-argF)U169 deoR recA1 endA1 hsdR17 (rK- mK-) phoA supE44 l- thi-1 gyrA96 relA1	Waters and Storz 2009
S. aureus strains
RN4220	Restriction-defective derivative of 8325-4	Kreiswirth et al. 1983
Newman	Methicillin sensible S. aureus strain isolated in 1952 from a human infection.	Cheung et al. 1994
Newman ∆sprC	Newman strain deleted for sprC	Le Pabic et al. 2015
Newman ∆sprC pCN38	Newman strain deleted for sprC with the low copy vector pCN38	Le Pabic et al. 2015
Newman ∆sprC pCN38-sprC	Newman strain deleted for sprC with the low copy vector pCN38-sprC	Le Pabic et al. 2015
Newman pRMC2-MS2	Newman strain expressing the MS2 tag	This study
Newman pRMC2-MS2-sprC	Newman strain expressing the fusion MS2_SprC	This study
Newman czrB-Flag	Newman strain expressing the fusion czrB-Flag	This study
Newman czrB-Flag pCN38	Newman strain expressing the fusion czrB-Flag with the low copy vector pCN38	This study
Newman czrB-Flag pCN38-sprC	Newman strain expressing the fusion czrB-Flag with the low copy vector pCN38-sprC	This study
Newman czrB-Flag pCN38-sprC-mut	Newman strain expressing the fusion czrB-Flag with the low copy vector pCN38-sprC-mut	This study
Newman ∆sprC-czrB-Flag	Newman strain deleted for sprC expressing the fusion czrB-Flag	This study
Newman ∆sprC-czrB-Flag pCN38	Newman strain deleted for sprC expressing the fusion czrB-Flag with the low copy vector pCN38	This study
Newman ∆sprC-czrB-FlagpCN38-sprC	Newman strain deleted for sprC expressing the fusion czrB-Flag with the low copy vector pCN38-sprC	This study
Newman ∆sprC-czrB-Flag pCN38-sprC-mut	Newman strain deleted for sprC expressing the fusion czrB-Flag with the low copy vector pCN38-sprC-mut	This study
Cheung AL, Eberhardt KJ, Fischetti VA. 1994. A method to isolate RNA from gram-positive bacteria and mycobacteria. Anal. Biochem. 222: 511–514.
Kreiswirth, Löfdahl, Betley MJ, O’Reilly M, Schlievert PM, Bergdoll MS, Novick RP. 1983. The toxic shock syndrome exotoxin structural gene is not detectably transmitted by a prophage. Nature. 305: 709-712.
Le Pabic H, Germain-Amiot N, Bordeau V, Felden B. 2015. A bacterial regulatory RNA attenuates virulence, spread and human host cell phagocytosis. Nucleic. Acids. Res. 43: 9232-48.
Waters LS, Storz G. 2009. Regulatory RNAs in Bacteria. Cell. 136: 615-628.
