# Supplementary material
Source: HighWire-hosted journal article supplement (doi:10.1101/rna.080122.124)
Supplement: Supplemental_Table_S4.xlsx [file Supplemental_Table_S4.xlsx]

## Sheet: Supplemental_Table_ S4
Supplementary Table S4: Plasmids used in this study
Plasmids	Relevant characteristics	References
pCN38	Modified low-copy-number shuttle vector with AmpR in E. coli and ErmR in S. aureus	Charpentier et al. 2004
pCN38-sprC	pCN38 with sprC of Newman under the control of its endogenous promoter	Le Pabic et al. 2015
pCN38-sprC-mut	pCN38 with sprC of Newman deleted for it binding domain with czrB, under the control of its endogenous promoter	This study
pRMC2	Shuttle vector, Cmr (cat194), pC194 replicon	Corrigan and Foster 2009
pRMC2-ms2	pRMC2 with ms2 tag	Ivain et al. 2017
pRMC2-MS2-sprC	pRMC2 with sprC of Newman fused to ms2	This study
pIMAY	Plasmid vector for allelic exchange with CmR, pWV01ts replicon	Monk et al. 2012
pIMAY-czrB-Flag	pIMAY for integration of a flag into czrB gene	This study
Charpentier E, Anton AI, Barry P, Alfonso B, Fang Y, Novick .P. 2004. Novel cassette-based shuttle vector system for gram-positive bacteria. Appl. Environ. Microbiol. 70: 6076-6085.
Le Pabic H, Germain-Amiot N, Bordeau V, Felden B. 2015. A bacterial regulatory RNA attenuates virulence, spread and human host cell phagocytosis. Nucleic. Acids. Res. 43: 9232-48.
Corrigan RM, Foster TJ. 2009 An improved tetracyclin-inducible expression vector for Staphylococcus aureus. Plasmid. 61: 126-129.
Ivain L, Bordeau V, Eyraud A, Hallier M, Dreano S, Tattevin P, Felden B, Chabelskaya S. 2017. An in vivo reporter assay for sRNA-directed gene control in Gram-positive bacteria: identifying a novel sRNA target in Staphylococcus aureus. Nucleic. Acids. Res. 45: 4994-5007.
Monk IR, Shah IM, Xu M, Tan MW, Foster TJ. 2012. Transforming the untransformable: application of direct transformation to manipulate genetically Staphylococcus aureus and Staphylococcus epidermidis. mBio. 3(2):e00277-11.
