# Supplementary material
Source: HighWire-hosted journal article supplement (doi:10.1101/rna.080122.124)
Supplement: Supplemental_Table_S5.xlsx [file Supplemental_Table_S5.xlsx]

## Sheet: Supplementary_Table_S5
Supplementary Table S5: DNA primers used in this study
DNA	Sequences	Purposes
ms2-SprC-SacI For	GACACCATCAGGGTCTGGAGCTCAAGTCAACGACCATG	pRMC2-ms2-sprC
ms2-SprC-EcoRI Rev	TAAAACGACGGCCAGTGAATTCATGATTACTTCGTATACTGTT
T7-sprC_For	TAATACGACTCACTATAGGGAAGTCAACGACCATGCGTGGACAG	SprC transcript
T7-sprC_ Rev	CCATGATTTCGAAGTCTTCATAAACTG	(147 nucleotides)
T7-sprC_For	TAATACGACTCACTATAGGGAAGTCAACGACCATGCGTGGACAG	SprCΔ27 transcript
T7-sprCΔ27_Mut1	CATGGCAATTTATACTCATAGTAAACGGCTACTACATTCG
T7-sprC_ Rev	CCATGATTTCGAAGTCTTCATAAACTG
T7-sprCΔ27_Mut2	AGCCGTTTACTATGAGTATAAATTGCCATGAGAGTAGAAG
T7-deoD_F1	TAATACGACTCACTATAGGGACAAAAATTCGCAAAAAAGG	deoD transcript
T7-deoD_R1	TTATCAGCAATATATTTTGCACGTAGCG	(173 nucleotides)
T7-deoD_F1	TAATACGACTCACTATAGGGACAAAAATTCGCAAAAAAGG	deoD transcript
T7-deoD_R2	AATTTAAATAATTACTCTGCGATTTCTAAAGCGATTTCCA	(774 nucleotides)
T7-czrB_F1	TAATACGACTCACTATAGGGGATATAGATGAAGTTATAAC	czrB transcript
T7-czrB_R1	TTAATGTACATGCGCGTGATGATGAGCATG	(312 nucleotides)
T7-czrB_F2	TAATACGACTCACTATAGGGAAAGCAAGCCATACATCACG	czrB transcript
T7-czrB_R2	GAGACCGCCGATGATTTCGATAAACATATATA	(169 nucleotides)
T7-czrB_F1	TAATACGACTCACTATAGGGGATATAGATGAAGTTATAAC	czrBΔ34 transcript
T7-czrBΔ34_Mut1	TATAATCGATTCATCATGTTTGAATATTTAAATGTAATAAATCATGCTCA
T7-czrB_R1	TTAATGTACATGCGCGTGATGATGAGCATG
T7-czrBΔ34_Mut2	TTATTACATTTAAATATTCAAAACATGATGAATCGATTATATGTTCAGGA
T7-sprC_For	TAATACGACTCACTATAGGGAAGTCAACGATGCGTGGACA	SprC-mut transcript
T7-sprC_Mut-comp	AAGCTTCTACTCTCATGGCAATTTATACTATGATAAACAACATTAATGCC
T7-sprC_ Rev	CCATGATTTCGAAGTCTTCATAAACTGAAGCTTCTACTCTCATGGCAATT
T7-czrB_For	TAATACGACTCACTATAGGGAGAAAACATTGAGCATGATTTATTACATTT	czrB-mut transcript
T7-czrB_Mut-comp	CATTGAGCATGATTTATTACATTTAAATATTCACCATATGACTAAACAACATGAAACGCC
T7-czrB_ Rev	AGGTTAAAATTATTAATGTACATGCGCGTGATGATG
pCN38- PstI-SprC-F	TAGATCTGCAGATAGGTGAGATGCATACAC	pCN38-SprCΔ27
SprC-mut1	CATGGCAATTTATACTCATAGTAAACGGCTACTACATTCG
pCN38- EcoRI-SprC-R	TACCGGAATTCGTATACTGTTATAACTG
SprC-mut2	AGCCGTTTACTATGAGTATAAATTGCCATGAGAGTAGAAG
A_czrB-P1 For	TTAGATGACATCCACGTAGC	Integration check
C_czrB-S2 For	CACATAGTCATTCACATAACCA
F_czrB-AS1 Rev	CCTACTGCCATTGAAAAGTT
H_czrB-P2 Rev	AACAACAATGATTATGATGCTTTGAG
B_KpnI-pIMAY-czrB For	TAAAGGGAACAAAAGCTGGGTACCAGCAAGCCATACATCACGCG	pIMAY-czrB-Flag
D_-czrB-Flag Rev	ATGTCATGATCTTTATAATCACCGTCATGGTCTTTGTAGTCATGTACATGCGCGTGATGATGAGCA
E_Flag-czrB For	TTATAAAGATCATGACATCGACTACAAAGACGATGACAAGTAATAATTTTAACCTACTGCCATTGCATCG
G_pIMAY-SacI-czrB Rev	TCACTATAGGGCGAATTGGAGCTCTACCAATCAGGTGTGTACTATCTGC
SprC probe	CGGCTACTACATTCGCATGT	SprC Northern Blot (acryl)
tmRNA probe	ACACGCTTAATGAGCTCGGG	tmRNA Northern Blot (acryl)
MS2 probe	AACGTACCCTGATGGTGTACG	MS2 Northern Blot (acryl)
Sonde czrAB_F	CAAGCCATACATCACGCGAA	czrAB Northern Blot (agarose)
Sonde czrAB_R	AAGGAGACCGCCGATGATTT
Sonde ARNtm_F	TTCATGGATTCGACAGGGGT	tmRNA Northern Blot (agarose)
Sonde ARNtm_R	CAGACTTCAAACGGCAGTGT
SprC_F	AAGCTTCTACTCTCATGGCAATTT	SprC RT-qPCR
SprC_R	TCAAACGGCAGTGTTTAGCA
ARNtm_F	CACTCTGCATCGCCTAACAG	SprC RT-qPCR
ARNtm_R	TCAAACGGCAGTGTTTAGCA
CzrA_F	ACGACAAGGCCAATCAATGA	czrA RT-qPCR
CzrA_R	GCGTGATGTATGGCTTGCTT
CzrB_F	TTTAAAGGCGGCGACACTTC	czrB RT-qPCR
CzrB_R	AATAGCTGCAGTAATGGCGC
SprD_F	ATTGATTTGGAAAGCGCAAA	SprD RT-qPCR
SprD_R	AAGGAGCGCCTTTCATTTTT
gyrB_F	GGTGGCGACTTTGATCTAGC	gyrB RT-qPCR
gyrB_R	TAATATGCGCTCCATCCACA
